# Supplementary material
Source: publisher site journal article supplement (https://www.dovepress.com/article/614240)
Supplement: Supplementary file 1 [file 614240%20Supplementary%20Material.docx]

**Supplementary Material**

Supplementary Material for: *“Artificial Intelligence for the Detection and Prediction of Antimicrobial Resistance in Klebsiella pneumoniae: A Systematic Review”*

**Contents**

- Supplementary Material S1: Search Strategy
- Supplementary Material S2: PRISMA 2020 Checklist
- Supplementary Material S3: Summary of Included Studies
- Supplementary Material S4: Workflow Time Improvements
- Supplementary Material S5: Risk of Bias Assessment

**Supplementary Material S1: Search Strategy**

A comprehensive search strategy was designed and run on four electronic databases: PubMed, EMBASE (Ovid), MEDLINE (Ovid), and the Cochrane Central Register of Controlled Trials (CENTRAL). Results were restricted to studies published from 1 January 2010 to the final search date (3 January 2026). Full search strategies are copied below.

(a) **PubMed Search String**

*("Artificial Intelligence"[Mesh] OR "Machine Learning"[Mesh] OR "Deep Learning"[Mesh] OR "artificial intelligence"[tiab] OR "machine learning"[tiab] OR "deep learning"[tiab] OR "predictive model*"[tiab] OR "classification model*"[tiab] OR "supervised learning"[tiab] OR "unsupervised learning"[tiab] OR "feature selection"[tiab] OR "neural network*"[tiab] OR "artificial neural network*"[tiab] OR "large language model*"[tiab] OR "natural language processing"[tiab] OR "generative AI"[tiab] OR ChatGPT[tiab] OR GPT[tiab] OR "random forest"[tiab] OR "support vector machine*"[tiab] OR "gradient boosting"[tiab] OR XGBoost[tiab] OR "computer vision"[tiab])*

*AND*

*("Klebsiella pneumoniae"[Mesh] OR "Klebsiella pneumoniae"[tiab] OR "K. pneumoniae"[tiab])*

*AND*

*("Drug Resistance, Microbial"[Mesh] OR "antimicrobial resistance"[tiab] OR "drug resistance"[tiab] OR resist*[tiab] OR suscepti*[tiab] OR "phenotypic resistance"[tiab] OR "genotypic resistance"[tiab] OR antimicrobial*[tiab] OR antibiotic*[tiab] OR antibacterial*[tiab] OR "anti-infect*"[tiab] OR "antimicrobial susceptibility testing"[tiab] OR AST[tiab] OR MIC[tiab] OR "minimum inhibitory concentration"[tiab] OR "resistance mechanism*"[tiab] OR stewardship[tiab] OR carbapenemase[tiab] OR ESBL[tiab])*

n = 223 (2010 onwards)

(b) **EMBASE (via OVID) Search String**

*exp artificial intelligence/ or exp machine learning/ or exp deep learning/ or ("artificial intelligence" or "machine learning" or "deep learning" or "predictive model*" or "classification model*" or "supervised learning" or "unsupervised learning" or "feature selection" or "neural network*" or "artificial neural network*" or "large language model*" or "natural language processing" or "generative AI" or ChatGPT or GPT or "random forest" or "support vector machine*" or "gradient boosting" or XGBoost or "computer vision").ti,ab,kw.*

*AND*

**klebsiella pneumoniae/ or ("klebsiella pneumoniae" or "k. pneumoniae").ti,ab,kw.*

*AND*

*exp antibiotic resistance/ or ("antimicrobial resistance" or "drug resistance" or "phenotypic resistance" or "genotypic resistance" or "antimicrobial susceptibility testing" or AST or MIC or "minimum inhibitory concentration" or "resistance mechanism*" or carbapenemase or ESBL).ti,ab,kw. or ((antimicrobial* or antibiotic* or antibacterial* or "anti-infect*" or drug) adj3 (resist* or suscepti*)).ti,ab,kw.*

limit 4 to yr="2010 -Current"

n = 604

(c) **MEDLINE (via OVID) Search String**

*exp Artificial Intelligence/ or exp Machine Learning/ or exp Deep Learning/ or ("artificial intelligence" or "machine learning" or "deep learning" or "predictive model*" or "classification model*" or "supervised learning" or "unsupervised learning" or "feature selection" or "neural network*" or "artificial neural network*" or "large language model*" or "natural language processing" or "generative AI" or ChatGPT or GPT or "random forest" or "support vector machine*" or "gradient boosting" or XGBoost or "computer vision").ti,ab,kf.*

*AND*

**Klebsiella pneumoniae/ or ("klebsiella pneumoniae" or "k. pneumoniae").ti,ab,kf.*

*AND*

*exp Drug Resistance, Microbial/ or ("antimicrobial resistance" or "drug resistance" or "phenotypic resistance" or "genotypic resistance" or "antimicrobial susceptibility testing" or AST or MIC or "minimum inhibitory concentration" or "resistance mechanism*" or carbapenemase or ESBL).ti,ab,kf. or ((antimicrobial* or antibiotic* or antibacterial* or "anti-infect*" or drug) adj3 (resist* or suscepti*)).ti,ab,kf.*

limit 4 to yr="2010 -Current"

n = 184

(d) **CENTRAL Search String**

*[mh "Artificial Intelligence"] OR [mh "Machine Learning"] OR [mh "Deep Learning"] OR "artificial intelligence":ti,ab OR "machine learning":ti,ab OR "deep learning":ti,ab OR (predictive NEXT model*):ti,ab OR (classification NEXT model*):ti,ab OR "supervised learning":ti,ab OR "unsupervised learning":ti,ab OR "feature selection":ti,ab OR (neural NEXT network*):ti,ab OR (artificial NEXT neural NEXT network*):ti,ab OR (large NEXT language NEXT model*):ti,ab OR "natural language processing":ti,ab OR "generative AI":ti,ab OR ChatGPT:ti,ab OR GPT:ti,ab OR "random forest":ti,ab OR (support NEXT vector NEXT machine*):ti,ab OR "gradient boosting":ti,ab OR XGBoost:ti,ab OR "computer vision":ti,ab*

*AND*

*[mh "Klebsiella pneumoniae"] OR "Klebsiella pneumoniae":ti,ab OR "K. pneumoniae":ti,ab*

*AND*

*[mh "Drug Resistance, Microbial"] OR "antimicrobial resistance":ti,ab OR "drug resistance":ti,ab OR "phenotypic resistance":ti,ab OR "genotypic resistance":ti,ab OR resist*:ti,ab OR suscepti*:ti,ab OR antimicrobial*:ti,ab OR antibiotic*:ti,ab OR antibacterial*:ti,ab OR (anti NEXT infect*):ti,ab OR "antimicrobial susceptibility testing":ti,ab OR AST:ti,ab OR MIC:ti,ab OR "minimum inhibitory concentration":ti,ab OR (resistance NEXT mechanism*):ti,ab OR stewardship:ti,ab OR carbapenemase:ti,ab OR ESBL:ti,ab*

n = 2 results (2010 onwards)

**Supplementary Material** **S2: PRISMA2020 Checklist**

| **Section and Topic** | **Checklist Item** | **Page Number in Manuscript where item is reported** |
| --- | --- | --- |
| **Title** | *Identify the report as a systematic review* | Page 1 |
| **Abstract** | *See the PRISMA2020 for Abstracts checklist* | Page 2 |
| **Rationale** | *Describe the rationale for the review in the context of existing knowledge* | Page 4-5 |
| **Objectives** | *Provide an explicit statement of the objective(s) or question(s) the review addresses.* | Page 5 |
| **Eligibility criteria** | *Specify the inclusion and exclusion criteria for the review and how studies were grouped for the syntheses.* | Page 6-7 |
| **Information sources** | *Specify all databases, registers, websites, organisations, reference lists and other sources searched or consulted to identify studies. Specify the date when each source was last searched or consulted.* | Page 6 |
| **Search strategy** | *Present the full search strategies for all databases, registers and websites, including any filters and limits used.* | Page 6 + Supplementary Material S1 |
| **Selection process** | *Specify the methods used to decide whether a study met the inclusion criteria of the review, including how many reviewers screened each record and each report retrieved, whether they worked independently, and if applicable, details of automation tools used in the process.* | Pages 6-7 |
| **Data collection process** | *Specify the methods used to collect data from reports, including how many reviewers collected data from each report, whether they worked independently, any processes for obtaining or confirming data from study investigators, and if applicable, details of automation tools used in the process.* | Page 7 |
| **Data items** | *List and define all outcomes for which data were sought. Specify whether all results that were compatible with each outcome domain in each study were sought (e.g. for all measures, time points, analyses), and if not, the methods used to decide which results to collect.* | Page 7 |
| *List and define all other variables for which data were sought (e.g. participant and intervention characteristics, funding sources).* | Page 7 |
| **Study risk of bias assessment** | *Specify the methods used to assess risk of bias in the included studies, including details of the tool(s) used, how many reviewers assessed each study and whether they worked independently, and if applicable, details of automation tools used in the process.* | Page 8 |
| **Effect measures** | *Specify for each outcome the effect measure(s) (e.g. risk ratio, mean difference) used in the synthesis or presentation of results.* | Page 7 |
| **Synthesis methods** | *Describe the processes used to decide which studies were eligible for each synthesis (e.g. tabulating the study intervention characteristics and comparing against the planned groups for each synthesis).* | Page 7 |
| *Describe any methods required to prepare the data for presentation or synthesis, such as handling of missing summary statistics, or data conversions.* | Page 7 |
| *Describe any methods used to tabulate or visually display results of individual studies and syntheses.* | Page 8 |
| *Describe any methods used to synthesize results and provide a rationale for the choice(s). If meta-analysis was performed, describe the model(s), method(s) to identify the presence and extent of statistical heterogeneity, and software package(s) used.* | Page 8 |
| **Study selection** | *Describe the results of the search and selection process, from the number of records identified in the search to the number of studies included in the review, ideally using a flow diagram.* | Page 8 |
| **Study characteristics** | *Cite each included study and present its characteristics.* | Page 8 + Supplementary Material S3 |
| **Risk of bias in studies** | *Present assessments of risk of bias for each included study.* | Page 11-12 + Supplementary Material S5 |
| **Results of individual studies** | *For all outcomes, present, for each study: (a) summary statistics for each group (where appropriate) and (b) an effect estimate and its precision (e.g. confidence/credible interval), ideally using structured tables or plots.* | Pages 10 + Supplementary Material S3 |
| **Results of syntheses** | *For each synthesis, briefly summarise the characteristics and risk of bias among contributing studies.* | Pages 8 + 11-12 + Supplementary Material S3 + S5 |
| *Present results of all statistical syntheses conducted. If meta-analysis was done, present for each the summary estimate and its precision (e.g. confidence/credible interval) and measures of statistical heterogeneity. If comparing groups, describe the direction of the effect.* | NA |
| **Discussion** | *Provide a general interpretation of the results in the context of other evidence.* | Page 12-15 |
| *Discuss implications of the results for practice, policy, and future research.* | Page 15-16 |
| **Registration and protocol** | *Provide registration information for the review, including register name and registration number, or state that the review was not registered.* | Page 5 |
| *Indicate where the review protocol can be accessed, or state that a protocol was not prepared.* | Page 5 |
| *Describe and explain any amendments to information provided at registration or in the protocol.* | Page 5 |
| **Support** | *Describe sources of financial or non-financial support for the review, and the role of the funders or sponsors in the review.* | Page 17 |
| **Competing interests** | *Declare any competing interests of review authors.* | Page 17 |
| **Availability of data, code and other materials** | *Report which of the following are publicly available and where they can be found: template data collection forms; data extracted from included studies; data used for all analyses; analytic code; any other materials used in the review.* | Page 17 |

Checklist of relevant PRISMA2020 reporting items for systematic reviews, with the corresponding page number(s) in the main manuscript or Supplementary Information where each item is addressed.

**Supplementary Material S3: Summary of Included Studies**

**Supplementary Table S3a: Study Identification and Primary Objectives**

| **Study ID** | **First Author** | **Year** | **Primary Objective** | **Study Aim** |
| --- | --- | --- | --- | --- |
| **KP001** | Tai-Han Lin | 2025 | 1. Resistance Phenotype | *AI clinical decision support system (AI-CDSS) using ML to analyse MALDI-TOF MS data to antibiotic resistance prediction* 28 |
| **KP002** | Alexander Sturm | 2024 | 3. Rapid AST Prediction | *Rapid AST using a machine-learning assisted nanomotion technology platform* 29 |
| **KP003** | Ekaterina Avershina | 2021 | 1. Resistance Phenotype | *Created neural networks to predict susceptibility for ampicillin, 3rd generation cephalosporins and carbapenems.* 30 |
| **KP004** | Eva Gato | 2021 | 2. Resistance Mechanism | *Develop and validate a standardised MALDI-TOF MS data-processing + ML analysis pipeline to rapidly identify carbapenemase-producing KP in a reproducible way suitable for routine lab screening* 31 |
| **KP005** | Andriamiharimamy Rajaonison | 2022 | 3. Rapid AST Prediction | *Developed a ML software capable of reading AST images without any human intervention, and automatically interprets the AST* 32 |
| **KP006** | Tai-Han Lin | 2024 | 1. Resistance Phenotype | *Design an AI clinical decision support system using MALDI TOF and ML for rapid detection of ceftazidime-avibactam (CZA) resistance in KP* 33 |
| **KP007** | Ming-Jr Jian | 2024 | 1. Resistance Phenotype | *AI-CDSS which incorporates ML algorithms for swift and precist detection of carbapenem-resistant and colistin-resistant strains* 34 |
| **KP008** | Yu Zeng | 2023 | 1. Resistance Phenotype | *Established four machine learning models for the drug sensitivity of KP to imipenem* 35 |
| **KP009** | Guanghui Guo | 2024 | 2. Resistance Mechanism | *Analyse single-cell raman spectra of three KP strains with different carbapenem resistant mechanisms with machine learning algorithm as a novel method to rapidly identify CRKP and their carbapenemase types* 36 |
| **KP010** | Tsi-Shu Huang | 2020 | 1. Resistance Phenotype | *Evaluated the application of ML methods for differentiation of drug-resistant KP (CRKP) vs. susceptible KP (CSKP) using MALDI-TOF data* 37 |
| **KP011** | George Abu-Aqil | 2023 | 2. Resistance Mechanism | *Investigate the capability of IR spectroscopy based ML tools for rapid detection of ESBL+ bacteria isolated directly from patients' urine* 38 |
| **KP012** | Uraib Sharaha | 2021 | 1. Resistance Phenotype | *Evaluate the potential of infrared spectroscopy in tandem with machine learning to assess the susceptibility of K. pneumoniae within approx. 20min following first culture* 39 |
| **KP013** | Marcus Nguyen | 2018 | 4. MIC Prediction | *Use whole genome sequence data of KP to develop an XGBoost-based ML model that predicts MIC for 20 antibiotics* 40 |
| **KP014** | Caroline Weis | 2022 | 1. Resistance Phenotype | *Develop a novel ML approach to predict AMR directly from MALDI-TOF MS profiles of KP isolates* 41 |
| **KP015** | Eva Gato | 2023 | 2. Resistance Mechanism | *ML approach that uses RF algorithm for direct prediction of carbapenemase-producing KP (CPK)* 42 |
| **KP016** | Jiaxin Yu | 2023 | 1. Resistance Phenotype | *Develop a rapid prediction method for CRKP and colistin-resistant KP (ColRKP) based on MALDI-TOF MS data using ML* 43 |
| **KP017** | Wei Liu | 2022 | 1. Resistance Phenotype | *Use machine learning to analyse raman spectroscopy (SERS) to discriminate between carbapenem-sensitve KP (CSKP) vs. carbapenem resistant KP (CRKP)* 44 |
| **KP018** | Quang H. Nguyen | 2023 | 4. MIC Prediction | *eMIC-AntiKP: use deep learning to predict the MIC of 20 antibiotics towards KP* 45 |
| **KP019** | Jiayue Lu | 2022 | 2. Resistance Mechanism | *Rapid identification of ARGs, hypervirulence-encoding factors and resistance phenotypes from K. pneumoniae strains using CNN* 46 |
| **KP020** | George Abu-Aqil | 2024 | 1. Resistance Phenotype | *Assessed the viability of using infrared spectroscopy-based machine learning to rapidly detect KP and determine its susceptibility to various antibiotics* 47 |
| **KP021** | Byeonggyu Ryu | 2024 | 4. MIC Prediction | *Introduce two DL approaches, integrating genomic data of KP and molecular structural data of 20 antibiotics to predict MIC* 48 |
| **KP022** | Xaviera A. López-Cortés | 2025 | 1. Resistance Phenotype | *Evaluate the efficacy of MALDI-TOF data for predicting antibiotic resistance in KP using ML* 49 |
| **KP023** | Chuangye Cai | 2025 | 2. Resistance Mechanism | *Machine learning classifiers applied to MALDI-TOF MS data to discriminate carbapenemase class/gene group (KPC-type vs. NDM-type CRKP)* 50 |
| **KP024** | Magali Jaillard | 2020 | 1. Resistance Phenotype | *Use ML on WGS (k-mer) data to predict phenotypic antimicrobial susceptibility in KP* 51 |
| **KP025** | Chunxuan Wang | 2022 | 1. Resistance Phenotype | *Develop machine learning-based models for identifying antibiotic resistance of KP to ciprofloxacin* 52 |
| **KP026** | Xiaobo Xu | 2025 | 1. Resistance Phenotype | *Analyse MALDI-TOF MS data with ML models to rapidly predict antibiotic susceptibility of KP to nine antibiotics* 53 |
| **KP027** | Kristel C. Tjandra | 2024 | 4. MIC Prediction | *MorphoAST - ML workflow for rapid determination of antimicrobial susceptibility of KP to meropenem* 54 |
| **KP028** | Xiaobo Xu | 2024 | 1. Resistance Phenotype | *ML algorithms on MALDI-TOF data to rapidly detect carbapenemase-resistant KP (CRKP)* 55 |
| **KP029** | Xaviera A. López-Cortés | 2024 | 1. Resistance Phenotype | *Deep neural network, MSDeepAMR to learn from raw mass spectra to predict AMR* 56 |
| **KP030** | César A. Astudillo | 2024 | 1. Resistance Phenotype | *Evaluate the performance of four ML algorithms to predict antibiotic resistance in KP* 57 |
| **KP031** | Giorgia Caruana | 2025 | 3. Rapid AST Prediction | *Investigate performances and turnaround time of Resistell Phenotech AST - platform that uses ML classifiers trained on bacterial nanomotion signals to predict antibiotic susceptibility.* 58 |
| **KP032** | William E. Fondrie | 2018 | 1. Resistance Phenotype | *Machine learning to identify KP and its colistin-resistant form using a dataset of mass spectra* 59 |
| **KP033** | Ming-Jr Jian | 2024 | 1. Resistance Phenotype | *Develop an AI-CDSS combining ML with MALDI-TOF MS data to predict ciprofloxacin and levofloxacin resistance in KP* 60 |
| **KP034** | Marcus Nguyen | 2020 | 1. Resistance Phenotype | *Build ML models to use conserved non-AMR genes to predict AMR phenotypes* 61 |
| **KP035** | Aytan-Aktug D. | 2021 | 1. Resistance Phenotype | *Build Random Forest-based ML classifiers to predict susceptible vs. resistant phenotypes for KP ( investigate prediction using incomplete genome sequence data)* 62 |
| **KP036** | Nenad Macesic | 2020 | 1. Resistance Phenotype | *Predict phenotypic polymyxin resistance from whole-genome sequencing data using machine learning* 63 |
| **KP037** | Niklas Wiesmann | 2025 | 1. Resistance Phenotype | *Validate the performance of ML models for AMR prediction using MALDI-TOF data* 64 |
| **KP038** | Xun Zhou | 2024 | 1. Resistance Phenotype | *Develop prediction models using WGS data* 65 |
| **KP039** | Chiara Condorelli | 2024 | 1. Resistance Phenotype | *Combine and incorporate machine learning methods on bacterial genomic data to predict antimicrobial resistance* 66 |
| **KP040** | Hsiu-Hsien Lin | 2025 | 1. Resistance Phenotype | *Assess ability of ML to interpret Raman spectra for predicting carbapenem-resistant KP* 67 |
| **KP041** | Jiaxin Yu | 2023 | 1. Resistance Phenotype | *Investigate the combination of MALDI-TOF MS with ML to predict carbapenem-resistant KP from blood cultures* 68 |
| **KP042** | Rundong Tan | 2021 | 4. MIC Prediction | *Use metagenomic data in combination with ML/DL to predict MIC of meropenem against KP* 69 |
| **KP043** | Xiaobo Xu | 2025 | 1. Resistance Phenotype | *Rapid detection of carbapenem-resistant KP in positive blood cultures via ML using MALDI-TOF MS* 70 |
| **KP044** | Jinyu Wang | 2022 | 1. Resistance Phenotype | *Rapidly detect carbapenem-resistant KP using ML and MALDI-TOF* 71 |
| **KP045** | Manal Suleiman | 2021 | 2. Resistance Mechanism | *Evaluate potential of infrared microspectroscopy with ML for rapid detection of ESBL-producing KP* 72 |
| **KP046** | Yun Huang | 2022 | 2. Resistance Mechanism | *Use MALDI-TOF to rapidly identify carbapenemase producing KP via a machine-learning based genetic algorithm approach* 73 |
| **KP047** | Secil Iskender | 2023 | 1. Resistance Phenotype | *Detect colistin resistance in KP using ML applied to MALDI-TOF data* 74 |
| **KP048** | Y. El Ghouch | 2025 | 2. Resistance Mechanism | *Develop a ML model that predicts phenotypic ESBL confirmation using MIC from routine AST results* 75 |
| **KP049** | Zhiyi Ye | 2025 | 1. Resistance Phenotype | *Rapidly identify and type carbapenem-resistant KP using MALDI-TOF and ML* 76 |
| **KP050** | Haiquan Kang | 2024 | 1. Resistance Phenotype | *Integrate deep learning (DL) with Raman Spectroscopy for the rapid identification of carbapenem-resistant KP* 77 |
| **KP051** | Yu-Ming Zhang | 2023 | 1. Resistance Phenotype | *Artificial neural network model to detect CRKP using MALDI-TOF data* 78 |
| **KP052** | Lin Ye | 2025 | 2. Resistance Mechanism | *Combine MALDI-TOF data with CNNs to establish a rapid and precise system for identifying carbapenemase subtypes in CRKP* 79 |
| **KP053** | Yanping Xu | 2024 | 1. Resistance Phenotype | *Develop a novel genotypic AST method (GenseqAMR) which can be directly applied to mNGS data to predict KP antibiotic suscetibility and resistance* 80 |
| **KP054** | Jing-Wen Lyu | 2023 | 1. Resistance Phenotype | *Rapidly predict multidrug resistant KP through deep learning analysis of SERS spectra* 81 |
| **KP055** | Timothy J. J. Inglis | 2020 | 3. Rapid AST Prediction | *Use machine-learning for analysis of data produced by flow cytometry assisted AST method* 82 |
| **KP056** | Fatma Uysal Ciloglu | 2022 | 1. Resistance Phenotype | *Detect colistin-resistant KP using SERS-based data with ML* 83 |
| **KP057** | Manal Suleiman | 2024 | 3. Rapid AST Prediction | *Employ infrared spectroscopy-based ML to significantly shorten time for susceptibility testing* 84 |

Summary of included studies showing study identifier, first author, publication year, primary clinical objective category, and the authors’ stated study aim.

**Supplementary Table S3b: Primary Inputs, AI Methods and Reference Standards**

| **Study ID** | **Primary Input Modality** | **AI** | **Models List** | **Best-performing / Extracted Model** | **Reference Standard** |
| --- | --- | --- | --- | --- | --- |
| **KP001** | MALDI-TOF MS | ML | Random forest classifier (RFC); Light gradient boosting machine (LGBM) | Random forest classifier | VITEK-2 AST |
| **KP002** | Nanomotion recordings | ML | Logistic regression (LR) | Logistic regression | MIC strips; broth micro-dilution |
| **KP003** | Whole genome sequencing (WGS) | DL | Feed-forward neural network; Ensemble neural network | Feed-forward neural network | Phenotypic MIC/AST (broth microdilution; MIC gradient strips; disk diffusion for ertapenem) interpreted with EUCAST ECOFF/breakpoints |
| **KP004** | MALDI-TOF MS | ML | Random forest (RF); Partial least squares discriminant analysis (PLSDA) | Random forest | Genomic characterization (WGS and PCR for blaOXA-48/blaKPC/blaNDM) |
| **KP005** | Disk diffusion antibiogram photographs | ML | Random forest (RF); support vector classifier (SVC) | Support Vector Classifier | Senior microbiologists’ interpretation using EUCAST disk diffusion breakpoint rules |
| **KP006** | MALDI-TOF MS | ML | Light Gradient Boosting Machine (LGBM); Gradient Boosting Classifier (GBC); Random Forest Classifier (RF); Extreme Gradient Boosting (XGBoost); AdaBoost Classifier (AdaBoost); Logistic Regression (LR); Linear Discriminant Analysis (LDA) | Light Gradient Boosting Machine | VITEK-2 AST for CZA (CLSI breakpoints) |
| **KP007** | MALDI-TOF MS | ML | Logistic Regression (LR); Linear Discriminant Analysis (LDA); Random Forest Classifier (RFC); Gradient Boosting Classifier (GBC); AdaBoost Classifier (ABC); XGBoost; Light Gradient Boosting Machine (LGBM); Support Vector Machine (SVM) | Random Forest Classifier | VITEK-2 AST (CLSI breakpoints) |
| **KP008** | MALDI-TOF MS | ML + DL | Least Absolute Shrinkage and Selection Operator (LASSO); logistic regression (LR); support vector machines (SVM); neural network (NN) | Logistic regression; Neural network | MIC + VITEK-2 compact system |
| **KP009** | Single-cell Raman spectra (SCRS) | ML | Principal component analysis (PCA); Support vector machine (SVM) | Support vector machine | Meropenem MIC assay; transcriptome sequencing (KPC-2/IMP-4 expression) |
| **KP010** | MALDI-TOF MS | ML | Random forest (RF); Logistic regression (LR); Naïve Bayes (NB); Nearest neighbors (NN); Support vector machine (SVM) | Random forest | Vitek 2 MIC (AST N320), CLSI 2018 breakpoints + VITEK 2 AES “carbapenemase” phenotype |
| **KP011** | FTIR spectroscopy (IR spectra) | ML | Principal component analysis (PCA); Random Forest classifier (RF) | Random Forest classifier | MALDI-TOF species ID; phenotypic ESBL testing via disk diffusion |
| **KP012** | FTIR microscopy (IR spectra) | ML | Random forest (RF); extreme gradient boosting (XGBoost) | Random forest | Vitek 2 AST (version 8.01) |
| **KP013** | Whole genome sequencing (WGS) | ML | Extreme gradient boosting regression (XGBoost) | Extreme gradient boosting regression (XGBoost) | BD-Phoenix MIC testing (CLSI breakpoints) |
| **KP014** | MALDI-TOF MS | ML + DL | Logistic Regression; LightGBM; Multilayer Perceptron (MLP) | Multilayer perceptron (MLP) | Routine phenotypic AST (VITEK 2; MIC strip; disc diffusion; EUCAST/CLSI) |
| **KP015** | MALDI-TOF MS | ML | Random forest (RF) | Random forest | EUCAST MIC screening (MicroScan/Vitek) + WGS/PCR carbapenemase genes |
| **KP016** | MALDI-TOF MS | ML | Light Gradient Boosting Machine (LightGBM) | Light Gradient Boosting Machine | Phoenix system AST; broth microdilution (colistin MIC); NG-Test CARBA 5; multiplex PCR |
| **KP017** | Surface-enhanced Raman Spectroscopy (SERS) spectra | ML + DL | Convolutional neural network (CNN); Gradient boosting (GB); Linear discriminant analysis (LDA); k-nearest neighbors (KNN); Random forest (RF); Adaptive boosting (AdaBoost); Decision tree (DT); Support vector machine (SVM) | Convolutional Neural Network (CNN) | Vitek2 Compact AST (MIC breakpoints; CLSI M100-S30) |
| **KP018** | Whole-genome sequencing (WGS) | DL | Convolutional neural network (CNN) | Convolutional neural network | BD-Phoenix MIC testing |
| **KP019** | Raman spectroscopy (Raman spectra) | ML + DL | Convolutional neural network (CNN; ResNet); support vector machine (SVM); logistic regression (LR) | Convolutional neural network | PCR (ARGs/virulence genes); broth microdilution MIC (phenotypes; CLSI/EUCAST) |
| **KP020** | FT-IR microspectroscopy | ML | Extreme Gradient Boosting (XGBoost) | XGBoost | MALDI-TOF species ID; Vitek 2 susceptibility |
| **KP021** | Whole genome sequencing (WGS) | DL | Convolutional Neural Network (CNN); Enformer-based Model | CNN-based model | BD-Phoenix MIC test |
| **KP022** | MALDI-TOF MS | ML | Support Vector Machines (SVM); Random Forest (RF); Logistic Regression (LR); CatBoost | CatBoost | Disk diffusion AST (CLSI M100, 33rd ed.) |
| **KP023** | MALDI-TOF MS | ML | Decision tree (DT); Random forest (RF); Support vector machine (SVM); Naïve Bayes (NB); Logistic regression (LR) | Random forest | VITEK 2 Compact AST + disk diffusion; qPCR (blaKPC/blaNDM) |
| **KP024** | Whole genome sequencing (WGS) | ML | Lasso-penalized logistic regression; Cluster-lasso logistic regression | Cluster-LASSO | Phenotypic MIC AST (CLSI breakpoints) |
| **KP025** | MALDI-TOF MS | ML | logistic regression (LR); support vector machine (SVM); random forest (RF); extreme gradient boosting (XGB) | Support Vector Machine; Extreme Gradient Boosting | Disk diffusion AST (CLSI M100 breakpoints) |
| **KP026** | MALDI-TOF MS | ML + DL | Random Forest (RF); eXtreme Gradient Boosting (XGBoost); Adaptive Boosting (AdaBoost); Logistic Regression (LR); Multilayer Perceptron (MLP); Support Vector Machine (SVM) | Random Forest; eXtreme Gradient Boosting | Vitek 2 Compact AST (AST-GN13; CLSI M100 33rd edition) |
| **KP027** | Time-lapse single-cell imaging | ML + DL | Random Forest (RF); K-Nearest Neighbors (KNN); Artificial neural network (MLPClassifier) | Random Forest | CDC-reported meropenem MIC; broth microdilution MIC (CLSI) |
| **KP028** | MALDI-TOF MS | ML | Random Forest (RF); Support Vector Machine (SVM); Logistic Regression (LR); Xgboost | Random Forest | Vitek2 Compact AST (AST-GN13), CLSI M100 (32nd ed) |
| **KP029** | MALDI-TOF MS | DL | Convolutional Neural Network (MSDeepAMR) | MSDeepAMR | AST profiles |
| **KP030** | MALDI-TOF MS | ML + DL | Multi-Layer Perceptron (MLP); Support Vector Classifier (SVC); Random Forest (RF); Extreme Gradient Boosting (XGB) | Multi-layer Perceptron; Support Vector Classifier | Antimicrobial susceptibility testing (AST) |
| **KP031** | Nanomotion (Phenotech sensor recordings) | ML | Ceftriaxone ML-classification model; Ciprofloxacin ML-classification model | Resistell Phenotech AST ceftriaxone classification model | Kirby-Bauer; VITEK 2 |
| **KP032** | MALDI-TOF MS | ML | Gradient boosted tree model (XGBoost); Single Feature baseline classifier | Gradient boosted tree model (XGBoost) | Colistin MIC (≤2 µg/mL susceptible; ≥4 µg/mL resistant; CLSI) |
| **KP033** | MALDI-TOF MS | ML | Logistic regression (LR); Linear discriminant analysis (LDA); Random forest (RF); Gradient boosting classifier (GBC); AdaBoost classifier (AdaBoost); XGBoost (XGBoost); Light gradient boosting machine (LGBM) | Random forest | VITEK 2 AST (CLSI breakpoints) |
| **KP034** | Whole genome sequencing (WGS) | ML | XGBoost (XGB); Random Forest (RF) | XGBoost | Laboratory-derived AST phenotypes (PATRIC metadata; MIC/SR; CLSI/EUCAST breakpoints) |
| **KP035** | Chromosomal genome alignments (reference-based) | ML | Random forest (RF) | Random forest | MIC/AST phenotypes interpreted using CLSI guidelines |
| **KP036** | Whole genome sequencing (WGS) | ML | Logistic regression (LR); Random forest (RF); Support vector machine classifier (SVC); Gradient-boosted trees classifier (GBTC) | gradient-boosted trees classifier (GBTC) | Broth microdilution MIC (CLSI) |
| **KP037** | MALDI-TOF MS | ML + DL | regularized logistic regression (LR); multilayer perceptron (MLP); support vector machine (SVM); random forest (RF); light gradient boosting machine (LGBM); eXtreme Gradient Boosting (XGB) | XGBoost | Vitek2 automated AST (EUCAST breakpoints) |
| **KP038** | Whole genome sequencing (WGS) | ML | LASSO regression; logistic regression; random forest; extreme gradient boosting | LASSO regression model | Phenotypic AST (broth microdilution; dilution/paper diffusion) |
| **KP039** | Next-Generation Sequencing data | ML | Gaussian Naive Bayes; Logistic regression; k-nearest neighbors; radius neighbors; Gradient Boosting; Bagging classifier | Gradient Boosting; k-Nearest Neighbours | VITEK 2 AST; EUCAST v14.0 breakpoints (Biometec dataset) |
| **KP040** | Raman spectroscopy (SERS) spectra | DL | RamanNet-based CNN | RamanNet (CNN) | Automated Phoenix system AST (BD Phoenix M50) |
| **KP041** | MALDI-TOF MS | ML | LightGBM | LightGBM | BD Phoenix M50 AST (CLSI 2022) |
| **KP042** | Metagenomic data (genome sequences) | ML + DL | Extreme Gradient Boosting (XGBoost); Deep neural network (DNN) | Deep Neural Network (DNN) regression model | Meropenem MIC values (Nguyen et al., 2018 supplementary table) |
| **KP043** | MALDI-TOF MS | ML | Decision Tree (DT); Random Forest (RF); Gradient Boosting Machine (GBM); eXtreme Gradient Boosting (XGBoost); Extremely Randomized Trees (ERT) | Random Forest; Extremely Randomized Trees | VITEK®2 AST (AST-GN13); CLSI M100 (33nd edition) |
| **KP044** | MALDI-TOF MS | ML | Random forest (RF); support vector machine (SVM); support vector machine with dimension reduction (SVM-K) | Support vector machine with dimension reduction (SVM-K) | Disk diffusion; VITEK-2 compact system |
| **KP045** | Infrared microspectroscopy (FTIR) | ML | Random Forest (RF); XGBoost | Random Forest | Disk diffusion test (ESBL expression) |
| **KP046** | MALDI-TOF MS | ML | Genetic algorithm (GA) | Genetic algorithm | TaqMan PCR for blaKPC-2 (DNA sequencing validated) |
| **KP047** | MALDI-TOF MS | ML | Linear discriminant analysis (LDA); Support vector machine (SVM); Ensemble | Linear Discriminant Analysis (LDA) | Broth microdilution MIC (EUCAST) |
| **KP048** | MIC-results from routine automated antimicrobial susceptibility testing (AST)-results | ML | Logistic Regression (LR); Random Forest (RF); XGBoost (XGB) | XGBoost | Combination disk diffusion test or commercial gradient tests (Etest; MIC Test Strip) |
| **KP049** | MALDI-TOF MS | ML | Genetic Algorithm (GA); Supervised Neural Network (SNN); Quick Classifier (QC) | Supervised Neural Network (SNN) | Siemens MicroScan WalkAway 96 PLUS AST (CLSI M100 33) |
| **KP050** | Raman spectroscopy (Surface-enhanced Raman scattering (SERS) spectra) | DL | Convolutional neural network (CNN) | Convolutional neural network | MALDI-TOF MS species ID; VITEK-2 Compact AST |
| **KP051** | MALDI-TOF MS | DL | Artificial neural network (ANN) | Artificial neural network | BD Phoenix M50 AST (CLSI M100) |
| **KP052** | MALDI-TOF MS | DL | Convolutional neural network (CNN) | Convolutional neural network | Multiplex PCR genotyping (blaKPC/blaNDM/blaOXA-48) |
| **KP053** | Clinical shotgun Metagenomic Sequencing (mNGS) | ML | Lasso regression (Lasso) | GenseqAMR | culture-based phenotypic AST |
| **KP054** | Surface-enhanced Raman scattering (SERS) spectra | DL | Convolutional neural network (CNN); CNN plus attention mechanism (CNN-attention) | CNN-attention model | Broth microdilution method (BMD) per CLSI |
| **KP055** | Flow-cytometer-assisted antimicrobial susceptibility test (FAST) | ML | Tree classifier; Polynomial classification | Supervised machine-learning Ensemble | Broth microdilution AST (Sensititre, Oxoid) |
| **KP056** | Surface-enhanced Raman scattering (SERS) spectra | Hybrid | Autoencoder–support vector machine (autoencoder-SVM); Principal component analysis–support vector machine (PCA-SVM) | Autoencoder–SVM | Broth microdilution colistin MIC (CLSI/EUCAST) |
| **KP057** | FTIR spectroscopy (infrared microscopy) | ML | Random forest (RF) | Random forest | VITEK 2 AST (CLSI) |

Summary of the primary input modalities, AI models evaluated, extracted or best-performing model, and reference standards used in each included study.

**Supplementary Table S3c: Primary Performance Metric, Target Antibiotic or Resistant Mechanism, Antibiotic Class and AI model of best**

| **Study ID** | **Primary Performance Metric** | **Primary Metric - Best** | **Target Antibiotic / Mechanism of Best** | **Class of Antibiotic of Best**  **(if applicable)** | **AI Model of Best** |
| --- | --- | --- | --- | --- | --- |
| **KP001** | AUC | 0.95 | imipenem; doripenem; gentamicin | Carbapenems; Aminoglycosides | Random forest classifier |
| **KP002** | Accuracy | 98.90% | Ceftriaxone | Third-generation cephalosporin | Logistic regression (4 signal parameters) |
| **KP003** | Accuracy | 100% | cefotaxime; ceftazidime; ertapenem; imipenem; meropenem | Cephalosporins; Carbapenems | Feed-forward neural network |
| **KP004** | Accuracy | 100% | Carbapenemase-producing Klebsiella pneumoniae | NA | Random forest |
| **KP005** | Accuracy | 95.98% | Bottom panel (Furane, Fosfomycin, SXT, Amikacin, Cipro, Colistin, Gent, DO | Multiple | Support Vector Classifier |
| **KP006** | AUC | 0.95 | ceftazidime-avibactam | Cephalosporin; β-lactamase inhibitor | Light Gradient Boosting Machine |
| **KP007** | AUC | 0.98 | colistin-resistant Klebsiella pneumoniae | polymyxin | Random Forest Classifier |
| **KP008** | AUC | 1 | Imipenem | Carbapenem | Logistic regression; Neural network |
| **KP009** | Accuracy | 100% | KPC-2; IMP-4 | NA | Support vector machine |
| **KP010** | Accuracy | 97% | Carbapenem resistance (CRKP) | Carbapenems | Random forest |
| **KP011** | AUROC | 0.87 | Extended-spectrum β-lactamase (ESBL) status | NA | Random Forest classifier |
| **KP012** | AUROC | 0.92 | sulfamethoxazole | Sulfonamide | Random forest |
| **KP013** | Accuracy (within ±1 two-fold dilution factor) | 100% | Ampicillin | Penicillin | Extreme gradient boosting regression (XGBoost) |
| **KP014** | AUROC | 0.76 | Cefepime | Cephalosporin | Multilayer perceptron (MLP) |
| **KP015** | AUROC | 1 | Carbapenemase-Producing KP (CPK) | NA | Random forest |
| **KP016** | AUROC | 0.9551 | Carbapenem-resistant Klebsiella pneumoniae | Carbapenems | Light Gradient Boosting Machine |
| **KP017** | AUC | 0.9957 | Carbapenem resistance (CRKP vs CSKP) | Carbapenems | Convolutional Neural Network (CNN) |
| **KP018** | 1-tier accuracy | 1 | Ampicillin | Penicillin | Convolutional neural network |
| **KP019** | AUC | 0.979 | rmpA/rmpA2 (virulence genes) | NA | Convolutional neural network |
| **KP020** | AUC | 0.79 | Ciprofloxacin | Fluoroquinolone | XGBoost |
| **KP021** | Raw accuracy | 0.981 | Cefuroxime sodium | 2nd Gen Cephalosporin | CNN-based model |
| **KP022** | AUROC | 0.73 | ciprofloxacin | Fluoroquinolone | CatBoost |
| **KP023** | AUC | 1 | KPC | NA | Random forest |
| **KP024** | AUC | 96.70% | Ciprofloxacin | Fluoroquinolone | Cluster-LASSO |
| **KP025** | AUC | 0.89 | ciprofloxacin | Fluoroquinolone | Support Vector Machine; Extreme Gradient Boosting |
| **KP026** | AUROC | 0.99 | Amikacin | Aminoglycoside | Random Forest; eXtreme Gradient Boosting |
| **KP027** | Accuracy | 99.70% | meropenem | Carbapenem | Random Forest |
| **KP028** | AUROC | 0.99 | Carbapenem resistance (CR-KP vs CS-KP) | Carbapenems | Random Forest |
| **KP029** | AUROC | 0.83 | Cefepime; Meropenem; Tobramycin | Fourth-generation cephalosporin; Carbapenem; Aminoglycoside | MSDeepAMR |
| **KP030** | Weighted F1 Score (WF1) | 0.92 | Ceftriaxone; Ciprofloxacin; Imipenem; Meropenem | Cephalosporin; Fluoroquinolone; Carbapenem | Multi-layer Perceptron; Support Vector Classifier |
| **KP031** | Categorical agreement (CA) | 100 | Ceftriaxone | Third-generation cephalosporin | Resistell Phenotech AST ceftriaxone classification model |
| **KP032** | AUROC | 0.999 | Colistin | Polymyxin | Gradient boosted tree model (XGBoost) |
| **KP033** | AUC | 0.95 | ciprofloxacin; levofloxacin | Fluoroquinolone | Random forest |
| **KP034** | F1 score | 0.9 | Ciprofloxacin | Fluoroquinolone | XGBoost |
| **KP035** | AUC | 0.974 | Levofloxacin | Fluoroquinolone | Random forest |
| **KP036** | AUROC | 0.933 | polymyxin resistance | polymyxins | gradient-boosted trees classifier (GBTC) |
| **KP037** | AUROC | 0.81 | piperacillin-tazobactam | Penicillin/beta-lactamase inhibitor | XGBoost |
| **KP038** | PPV | 100 | piperacillin/tazobactam | Penicillin/beta-lactamase inhibitor | LASSO regression model |
| **KP039** | Accuracy | 98.70% | Colistin | Polymyxin | Gradient Boosting; k-Nearest Neighbours |
| **KP040** | AUROC | 0.96 | carbapenem-resistant Klebsiella pneumoniae | Carbapenems | RamanNet (CNN) |
| **KP041** | AUC | 0.828 | Carbapenem resistance (CR-KP vs CS-KP) | Carbapenems | LightGBM |
| **KP042** | Accuracy | 91.90% | Meropenem | Carbapenem | Deep Neural Network (DNN) regression model |
| **KP043** | AUROC | 0.95 | Carbapenems | Carbapenem | Random Forest; Extremely Randomized Trees |
| **KP044** | AUC | 0.9356 | Carbapenem resistance | Carbapenems | Support vector machine with dimension reduction (SVM-K) |
| **KP045** | AUROC | 0.94 | ESBL+ vs ESBL− | NA | Random Forest |
| **KP046** | AUROC | 1 | blaKPC-2 | NA | Genetic algorithm |
| **KP047** | Accuracy | 99.30% | Colistin | Polymyxin | Linear Discriminant Analysis (LDA) |
| **KP048** | AUROC | 0.97 | ESBL-production | NA | XGBoost |
| **KP049** | Sensitivity | 90.08 | Carbapenem resistance (CRKP vs CSKP) | Carbapenems | Supervised Neural Network (SNN) |
| **KP050** | Accuracy | 99.85% | carbapenem-resistant Klebsiella pneumoniae | Carbapenems | Convolutional neural network |
| **KP051** | AUROC | 0.91 | Carbapenem-resistant Klebsiella pneumoniae | Carbapenem | Artificial neural network |
| **KP052** | Accuracy | 96.06% | Carbapenemase subtype (KPC/NDM/OXA-48) | NA | Convolutional neural network |
| **KP053** | AUC | 0.956 | Ceftazidime | Cephalosporin | GenseqAMR |
| **KP054** | Accuracy | 99.46% | Carbapenem resistance; Polymyxin resistance | Carbapenem; Polymyxin | CNN-attention model |
| **KP055** | Categoric agreement (CA) | 91.07% | all SEMPA1 and SEMSE3 MICs | NA | Supervised machine-learning Ensemble |
| **KP056** | AUC | 0.98 | Colistin | Polymyxin | Autoencoder–SVM |
| **KP057** | AUC | 0.84 | Ciprofloxacin | Fluoroquinolone | Random forest |

Summary of the extracted primary performance outcome for each study, including the primary performance metric used, best reported value, target antibiotic or resistance mechanism, corresponding antibiotic class (where applicable), and the AI model identified as the best performing.

**Supplementary Table S3d: Validation Approaches, Reported Workflow Benefits and Conclusions**

| **Study ID** | **Internal Validation** | **External Validation** | **Stated Workflow Time Benefit** | **Conclusion** |
| --- | --- | --- | --- | --- |
| **KP001** | GridSearchCV with 5-fold CV | NA | Up to 24 h (1 day) faster to targeted antibiotic selection (vs conventional AST) | *Integrating MALDI-TOF MS with ML accelerates the AST by one day compared to traditional methods* |
| **KP002** | 3-fold CV repeated 300 times | Independent test datasets of strains not used in training; interim multi-centre PHENOTECH-1 testing | AST results in 2 h (37°C) or 4 h (RT) instead of 24 h (current AST) | *Shows potential for using an ML-assisted nanomotion platform for accurate and rapid AST Testing* |
| **KP003** | Train/validate/test split (80%/10%/10%) | Tested on published external WGS datasets (Nguyen et al.; plus NCBI Pathogen Detection isolates) | <10 min to genotype-to-phenotype susceptibility prediction | *Trained neural networks for phenotype prediction of AST from genomic data of KP isolates. Overall accuracy from 94% to 100% (apart from ampicillin resistance)* |
| **KP004** | k-fold (k=10) cross-validation | NA | Not Stated | *Using the random forest algorithm, 100% of CPK isolates were correctly identified when all the peaks in the spectra were selected as input features and total ion current normalisation was applied* |
| **KP005** | Blind test on validation set of 5100 (held-out) antibiogram photos | NA | Not Stated | *Antilogic is the first machine learning software developed for AST interpretation* |
| **KP006** | GridSearchCV with 5-fold cross-validation | NA | Predicted within minutes; saves ~24 h (1 day) vs traditional AST | *Demonstrates the feasibility and effectiveness of MALDI-TOF MS and ML for rapidly detecting CZA resistance in KP* |
| **KP007** | GridSearchCV with 5-fold cross-validation | NA | Predicted in minutes vs traditional AST requiring 1 day (~24 h saved) | *Integrating MALDI-TOF MS with machine learning in an AI-CDSS has greatly expedited the detection of KP resistance by approximately 1 day.* |
| **KP008** | Grid search with 3-fold cross-validation | NA | Not Stated | *Established an inexpensive and well-accuracy ML model based on MALDI-TOF MS to predict the drug sensitivity of KP to imipenem* |
| **KP009** | Train/test split (different days) | NA | Not Stated | *Novel method for rapid identification of CRKP and their carbapenemases types, and a theoretical basis for identifying the relationship between Raman spectra and transcriptome of bacteria.* |
| **KP010** | Leave-one-out cross-validation | NA | Not Stated | *Demonstrated that MALDI-TOF MS can reliably differentiate CRKP from CSKP using machine learning* |
| **KP011** | Leave-one-patient-out (LOPO) cross-validation | NA | ~40 min to ESBL test result | *IR spectroscopy combined with ML algorithms such as RF can classify KP samples as ESBL + or - separately in 40min when bacterial samples are isolated directly from patients urine* |
| **KP012** | Leave-one-group-out (LOGO) cross-validation | NA | ~20 min to susceptibility result after first culture | *Combining IR spectroscopy with ML can classify KP isolates into sensitive and resistant across antibiotics with a success rate higher than 80%* |
| **KP013** | 10-fold cross-validation | NA | Not Stated | *Machine learning can build a complete in silico MIC prediction panel for K. pneumoniae* |
| **KP014** | Random 80/20 train-test split; 5-fold CV tuning | Across-site external validation; train on one site (or pooled sites), and test on a different site (DRIAMS-A-D). | Resistance information within 24 h | *MALDI-TOF MS-based AMR prediction from routine diagnostic clinical samples is capable of providing accurate predictions within 24h using ML* |
| **KP015** | Internal 10-fold CV (CPK vs. NCPK); 7-fold CV (for carbapenemase-type step) | NA | CPK resistance detection within a few minutes | *MALDI-TOF MS-based ML can provide novel ways to predict AMR, e.g. in the identification of CPK* |
| **KP016** | Five-fold train-test split | Independent validation set from a separate site (CMUH isolates collected 2019–2022) | Final report available ~33.6 h earlier (median saving 1.4 days) | *Developed a MALDI-TOF MS-based ML model for rapid identification of CRKP and colistin resistance* |
| **KP017** | 5-fold cross-validation | NA | Not Stated | *Eight supervised ML models could successfully predict CSKP vs. CRKP, with the CNN algorithm performing highest* |
| **KP018** | Random train/validation/test split (80%/10%/10%) | NA | Not Stated | *Developed computational models to predict MIC of 20 antibiotics towards KP using convolutional neural networks (CNN)* |
| **KP019** | 10-fold cross-validation; independent (held-out) test set | NA | Not Stated | *Raman spectroscopy combined with AI and large datasets is a promising technique for high accuracy identification of microbial genotype and phenotype* |
| **KP020** | Five-fold CV with nested 5-fold CV for hyperparameter tuning | NA | ~40 min to susceptibility result from urine sample | *FTIR combined with XGBoost shortens the time of susceptibility test to around 40 mins.* |
| **KP021** | 10-fold cross-validation + held-out 11th test subset for final testing | NA | Not Stated | *Approaches using ML/DL can significantly enhance clinicial decision-making during the empirical treament; pre-trained models can predict MIC almost instantensously once WGS data is ready* |
| **KP022** | 10-fold cross-validation | NA | Not Stated | *Highlights the potential of integrating MALDI-TOF MS data with ML to predict antibiotic resistance in KP, with the CatBoost model outperforming other models* |
| **KP023** | 5-fold cross-validation; internal test set | External validation on independent strain collections (external institute isolates) + across MALDI-TOF platforms (3 MALDI systems) | Not Stated | *ML combined with MALDI-TOF can effectively classify KPC strains, validated across different instruments and external datasets* |
| **KP024** | 10-fold cross-validation | Independent External test set (634 strains) | Not Stated | *Enhancing the interpretability of genomic k-mer-based ML models for AMR prediction can improve their clinical utility* |
| **KP025** | Fivefold cross-validation on training set | NA | Not Stated | *ML models provide sensitive forecasts of ciprofloxacin resistance, which may aid in early antibiotic selection against KP* |
| **KP026** | Random 70:30 train-test split + ten-fold cross-validation | NA | Resistance detection / antibiotic susceptibility prediction in 1–2 h | *Analysing MALDI-TOF MS with ML can rapidly predict antibiotic suscptibility to KP, reducing resistance detection time to 1-2h* |
| **KP027** | Holdout; 5-fold cross-validation | Tested on five, independent "unseen" KP strains and two clinical patient samples (urine isolates) | MIC / antimicrobial susceptibility prediction in <50 min | *Demonstrated the feasability of predicting MIC in a fraction of the bacterial doubling time (<50min) using ML* |
| **KP028** | 70%/30% hold-out + 10-fold CV | NA | Not Stated | *MALDI-TOF MS based combination with ML algorithm has high detection and classification efficacy for CR-KP* |
| **KP029** | 10-fold cross-validation (on DRIAMS-A) | External test on DRIAMS-B/C/D (different laboratories) | Not Stated | *Complete methodology for antimicrobial resistance prediction from raw mass spectrometry data using deep learning* |
| **KP030** | 80%/20% stratified train-test split | NA | Not Stated | *ML models applied to MALDI-TOF spectra can predict AMR rapidly; also demonstrates that a multi-label ML framework (predict resistance to multiple antibiotics simultaneously) matches / outperforms traditional single-label models* |
| **KP031** | NA | Prospective, real-life diagnostic accuracy evaluation on newly collected samples | >10 h faster to AST result (15.7 h from blood culture positivity) | *ML-assisted nanomotion classifier can deliver rapid, automated AST with very strong ceftriaxone performance* |
| **KP032** | Randomised split 60% training / 40% test; 10-fold CV tuning | N | Not Stated | *Identifies KP from glycolipid MALDI-TOF MS, with ML models employed capable of identifying LP isolates and detecting colistin resistance with high accuracy and specificity* |
| **KP033** | Temporal split (Jan-Sep train; Oct-Dec validate) | NA | Not Stated | *Successful AI-CDSS with the application of ML-enhanced MALDI-TOF for predicting quinolone-resistant KP* |
| **KP034** | 80%/10%/10% split; 10-fold CV | NA | Not Stated | *ML models can accurately predict AMR using non-AMR genes* |
| **KP035** | 5-fold cross-validation (train/test/held-out validation) | NA | Not Stated | *AMR phenotypes can be predicted using small sets of conserved genes via ML* |
| **KP036** | 10-fold CV; bootstrapping (GWAS) | NA | Not Stated | *Proof-of-concept that WGS data can accurately predict polymyxin resistance in KP through ML analysis.* |
| **KP037** | 10 random 80%/20% train-test splits; inner 5-fold CV | Tested on external DRIAMS-A dataset | 1 day earlier to AST result (vs conventional routine diagnostics) | *Performance of ML for prediction of AMR based on MALDI-TOF is good (AUROC > 0.8), however ML models need to be trained on local data and retrained regularly to maintain good performance.* |
| **KP038** | 7:3 split; 10-fold CV | Independent test set of 154 strains | 48.4 h faster to AST result (19.5 h vs 67.9 h culture-based AST) | *Highlights the potential of sequence-based prediction models using ML to guide antibiotic treatment decisions* |
| **KP039** | GridSearchCV model selection | NA | Not Stated | *Antimicrobial resistance in KP can be predicted using ML methods applied to genome sequence data* |
| **KP040** | Random 8:2 train/val; held-out test split | NA | Within minutes after species identification (bypassing culture-based AST) | *Developed a fast and cost-effective system, AIRDIS which combined Raman spectroscopy with ML to predict CRKP* |
| **KP041** | 5-fold internal validation | NA | Rapid CRKP ID (from flagged blood cultures): within 1 h | *Novel ML-based MALDI-TOF MS approach enables rapid identification of CRKP from flagged blood cultures within 1h* |
| **KP042** | 8:2 train/test split; 5-fold CV | NA | Not Stated | *Deep learning models can accurately predict meropenem MICs in KP from genomic features, achieving > 90% accuracy* |
| **KP043** | 70/30 train/test split; ten-fold CV | Independent positive blood culture set (n=127) | Rapid detection/diagnostic output: ~0.5 h | *Tree-based ML can be used to detect the susceptibility of KP to carbapenems in positive blood cultures* |
| **KP044** | 10-fold cross-validation (average over 100 runs) | NA | Not Stated | *Three ML models showed excellent classificaiton performance differentiating CRKP vs. CSKP; SVM-K model was best.* |
| **KP045** | 5-fold cross-validation | NA | ESBL+/− determination after initial culture: ~20 min | *Infrared spectroscopy in tandem with ML can successfully clasift KP isolates as ESBL +ve of -ve within several minutes of initial culture.* |
| **KP046** | NA | Independent external verification set: 60-isolate set (33 KPC-2, 27 CSKP) | Not Stated | *Genetic algorithm-based ML approached applied to MALDI-TOF can detect carbapenemase producing KP* |
| **KP047** | 10-fold cross-validation | External validation on an independent set of 60 isolates | Not Stated | *Developed a rapid and accurate MALDI-TOF MS screening assay to identify colistin resistance in KP via ML* |
| **KP048** | Stratified 10-fold cross-validation (80/20) | EV on a separate cohort from Amsterdam UMC (Vitek) | Timeline to ESBL-detection shortened; switch to definite treatment after 24 h | *ML-models for prediction of ESBL-production using routine AST-system data achieved high performances.* |
| **KP049** | Cross-validation + separate validation strains | NA | Not Stated | *Developed a model for the rapid clinical identification of CRKP vs. CSKP* |
| **KP050** | 5-fold cross-validation (8:2 train:test) | NA | Detection timeline reduced by ≥24–48 h (direct resistance analysis from positive blood culture; avoids subculture) | *Developed an innovative approach combining DL with SERS data for rapid identification of CRKP* |
| **KP051** | 10-fold cross validation (training set) | Independent holdout; balanced 74 CRKP/74 CSKP | Not Stated | *Established a robust ANN model using AST and MALDI-TOF MS data to accurately identify CRKP* |
| **KP052** | 5-fold cross-validation (80/20 strains) | NA | ≤20 min post-culture (after bacterial culture) | *Establishes a CNN-driven MALDI-TOF MS framework for concurrent CRKP identification and precise carbapenemase subtyping; achieving near-perfect concordance with gold-standard molecular methods* |
| **KP053** | Random split into train/val/test (75%/13%/12%); 10-fold CV | Validated on a set of 191 KP clinical specimens (multi-hospital) | Genotypic AST turnaround time 18.34±0.87 h (vs culture-based AST 60.15±21.58 h) | *Developed and validated an AMR prediction model of KP that can be applied directly to mNGS data to rapidly and accurate identify KP and its resistance patterns* |
| **KP054** | 5-fold cross-validation | NA | Not Stated | *Combining SERS spectroscopy with deep learning (CNN-attention) achieves rapid and accurate discrimination of KP strains* |
| **KP055** | Tested on expanded 'challenge panel' of additional isolates/species + 2 new clinical blood-culture isolates | NA | Same-day PIC/AST result by 14:59 from 08:30 receipt (~6 h 29 min) | *Combination of ML with the FAST method generated same-day AST results* |
| **KP056** | 10-fold cross-validation (30 runs) | NA | Culture incubation reduced to 4 h (TSB) vs 24 h (agar) (~20 h saved) | *Proposed a fast method to discriminate colistin-resistant vs. susceptible KP using SERS-based sensor and machine learning* |
| **KP057** | 5-fold nested cross-validation | NA | Susceptibility testing shortened to 10 h (vs ≥48 h conventional) | *Combination of IR spectroscopy with ML can dramatically reduce time needed for bacterial identification and susceptibility determination from 48h to 10h* |

Summary of the internal and external validation methods used in each study, any author-reported workflow time benefit relative to conventional microbiology pathways, and the study’s main conclusion.

**Supplementary Material S4: Workflow Time Improvements**

| Study id | AI Method | INPUT | AUTHOR-STATED WORKFLOW  time improvement |
| --- | --- | --- | --- |
| KP003 | DL | WGS | Susceptibility prediction ‘within minutes’ after sequencing information available. |
| KP006 | ML | MALDI-TOF MS | Detects CZA resistance ‘within minutes’ after pathogen confirmation by MALDI-TOF. |
| KP007 | ML | MALDI-TOF MS | Predict antibiotic resistance ‘within minutes’ by AI-CDSS using MALDI-TOF MS protein profiles. |
| KP011 | ML | IR spectroscopy | Determine ESBL+ KP ‘within 40 min’ of receiving the patient urine. |
| KP012 | ML | IR spectroscopy | Assess susceptibility of KP ‘within approximately 20min’ after first culture. |
| KP015 | ML | MALDI-TOF MS | Identification of CPK within a ‘few minutes’. |
| KP020 | ML | FTIR | Determination of KP susceptibility to various antibiotics within approximately ’40 min’ after receiving the patient’s urine sample. |
| KP027 | ML/DL | Time-lapse single-cell imaging | MIC/antimicrobial susceptibility prediction with over 99% accuracy within ’50 min’. |
| KP040 | ML | Raman Spectroscopy | Predict CRKP ‘within minutes’ following species identification, bypassing culture-based AST. |
| KP041 | ML | MALDI-TOF MS | CRKP ID from flagged blood cultures within 1 h. |
| KP043 | ML | MALDI-TOF MS | Detect susceptibility of KP to carbapenems within ‘approximately 0.5 h’. |
| KP045 | ML | IR spectroscopy | ESBL-positive/ -negative determination in approx. ’20 minutes’ following initial culture. |
| KP052 | DL | MALDI-TOF MS | Identification of carbapenemase subtype in CRKP in ‘≤ 20min’ post-culture. |

Summary of studies that explicitly reported a time-to-result advantage of < 1 hour relative to conventional microbiology workflows. Timepoints are reported as defined in the original studies, therefore should be interpreted in the context of each individual study.

**Supplementary Material S5: Risk of Bias Assessment**

**Supplementary Table S5a: PROBAST Risk of Bias and Applicability Assessment for Prediction-Model Studies**

|  | **RISK OF BIAS (LOW / HIGH / UNCLEAR)** | | | | **APPLICABILITY (LOW Concern / HIGH / UNCLEAR)** | | | **OVERALL** | |
| --- | --- | --- | --- | --- | --- | --- | --- | --- | --- |
| **Study ID** | **Participants** | **Predictors** | **Outcome** | **Analysis** | **Participants** | **Predictors** | **Outcome** | **RoB** | **Applicability** |
| **KP001** | Unclear | Low | Low | High | Low | Low | Low | High | Low |
| **KP003** | Unclear | Low | High | High | Low | High | Unclear | High | High |
| **KP006** | Unclear | Low | Low | Unclear | Low | Low | Low | Unclear | Low |
| **KP007** | High | Low | High | High | Low | Low | Low | High | Low |
| **KP013** | Unclear | Low | Unclear | High | Unclear | High | Low | High | High |
| **KP014** | Low | Low | Unclear | Low | Low | Low | Low | Unclear | Low |
| **KP018** | Unclear | Low | Unclear | High | Low | High | Low | High | High |
| **KP021** | Unclear | Low | Unclear | High | Low | High | Low | High | High |
| **KP024** | Unclear | Low | Unclear | Low | Low | High | Low | Unclear | High |
| **KP032** | High | Low | Unclear | High | High | High | Low | High | High |
| **KP033** | Low | Low | Low | Unclear | Low | Low | Low | Unclear | Low |
| **KP034** | High | Low | Unclear | High | High | High | Low | High | High |
| **KP035** | High | Low | Unclear | Unclear | High | High | Low | High | High |
| **KP036** | High | Low | Unclear | High | High | High | Low | High | High |
| **KP037** | Low | Low | Low | Unclear | Low | Low | Low | Unclear | Low |
| **KP038** | Unclear | Low | Unclear | Unclear | Unclear | High | Low | Unclear | High |
| **KP039** | High | Low | Unclear | High | High | High | Low | High | High |
| **KP042** | High | Low | Unclear | High | High | High | Low | High | High |
| **KP048** | Low | Low | Low | Unclear | Low | Low | Low | Unclear | Low |
| **KP051** | Low | Low | Low | High | High | Low | Low | High | High |
| **KP052** | High | Low | Low | High | High | Low | Low | High | High |
| **KP053** | Unclear | Low | Unclear | High | Unclear | High | Low | High | High |
| **KP054** | High | Low | Low | High | High | High | Low | High | High |
| **KP056** | High | Low | Low | High | High | High | Low | High | High |

Study-level PROBAST assessment for included studies judged to be prediction-model investigations, showing domain-level risk of bias and applicability judgements across participants, predictors, outcomes and analysis, together with overall risk-of-bias and applicability assessments. Bold bordered cells denote overall risk of bias and applicability judgements for each study.

**Supplementary Table S5b: QUADAS-2 Risk of Bias and Applicability Assessment for Diagnostic Accuracy Studies**

|  | **RISK OF BIAS (LOW / HIGH / UNCLEAR)** | | | | **APPLICABILITY (LOW Concern / HIGH / UNCLEAR)** | | | **OVERALL** | |
| --- | --- | --- | --- | --- | --- | --- | --- | --- | --- |
| **Study ID** | **Patient Selection** | **Index Test** | **Reference Standard** | **Flow and Timing** | **Patient Selection** | **Index Test** | **Reference Standard** | **RoB** | **Applicability** |
| **KP002** | High | High | Unclear | Low | High | Low | Low | High | High |
| **KP004** | High | High | Low | Low | Low | Low | Low | High | High |
| **KP005** | High | High | Low | Low | High | Unclear | Low | High | High |
| **KP008** | High | High | Low | Low | Unclear | Low | Low | High | Unclear |
| **KP009** | High | High | Low | Low | High | High | Low | High | High |
| **KP010** | High | High | High | Low | High | Low | Low | High | High |
| **KP011** | Unclear | Low | Low | Unclear | Unclear | High | Low | Unclear | High |
| **KP012** | Unclear | High | Low | Unclear | Unclear | High | Low | High | High |
| **KP015** | High | High | Low | High | High | High | Low | High | High |
| **KP016** | High | Unclear | Low | Low | Low | Low | Low | High | Low |
| **KP017** | High | High | Low | High | High | High | Low | High | High |
| **KP019** | High | High | Low | High | High | Low | Low | High | High |
| **KP020** | Unclear | High | Low | High | Low | Unclear | Low | High | Unclear |
| **KP022** | Unclear | High | Low | Unclear | Low | Low | Low | High | Low |
| **KP023** | High | High | Low | High | High | Low | Low | High | High |
| **KP025** | High | High | Low | High | Low | Low | Low | High | Low |
| **KP026** | Low | Low | Low | Unclear | Low | Low | Low | Unclear | Low |
| **KP027** | High | High | Low | Low | High | Unclear | Low | High | High |
| **KP028** | High | High | Low | Low | High | Low | Low | High | High |
| **KP029** | Unclear | Unclear | Unclear | Unclear | Low | Low | Unclear | Unclear | Unclear |
| **KP030** | High | Unclear | Unclear | High | High | Low | Unclear | High | High |
| **KP031** | Low | Unclear | Low | Low | Low | Low | Low | Unclear | Low |
| **KP040** | High | High | Unclear | Low | Low | High | Low | High | High |
| **KP041** | Low | High | Low | High | Low | Low | Low | High | Low |
| **KP043** | Low | Unclear | Low | Low | Low | Low | Low | Unclear | Low |
| **KP044** | High | High | Low | Low | High | Low | Low | High | High |
| **KP045** | Unclear | High | Unclear | High | High | Unclear | Unclear | High | High |
| **KP046** | High | High | Low | Low | High | Low | Low | High | High |
| **KP047** | High | High | Low | Low | High | Low | Low | High | High |
| **KP049** | High | High | Unclear | High | High | Low | Low | High | High |
| **KP050** | Unclear | High | Unclear | High | High | Unclear | Low | High | High |
| **KP055** | High | High | Low | Low | High | High | Low | High | High |
| **KP057** | Unclear | High | Unclear | Low | Unclear | High | Low | High | High |

Study-level QUADAS-2 assessment for included studies judged to be diagnostic accuracy investigations, showing domain-level risk of bias judgements for patient selection, index test, reference standard, and flow and timing, together with applicability assessments and overall study judgement. Bold bordered cells denote overall risk of bias and applicability judgements for each study.
